# Supplementary material for: Effects of α-tubulin acetylation on microtubule structure and stability
Source: PubMed Central journal article supplement — Proc Natl Acad Sci U S A. 2019 May 9;116(21):10366–71. doi: 10.1073/pnas.1900441116 (PMC6535015; doi:10.1073/pnas.1900441116), 2019-05-09
Supplement: pnas.1900441116.sapp.pdf [file pnas.1900441116.sapp.pdf]

1 **SI APPENDIX**  
2 **SUPPLEMENTARY FIGURES**

3

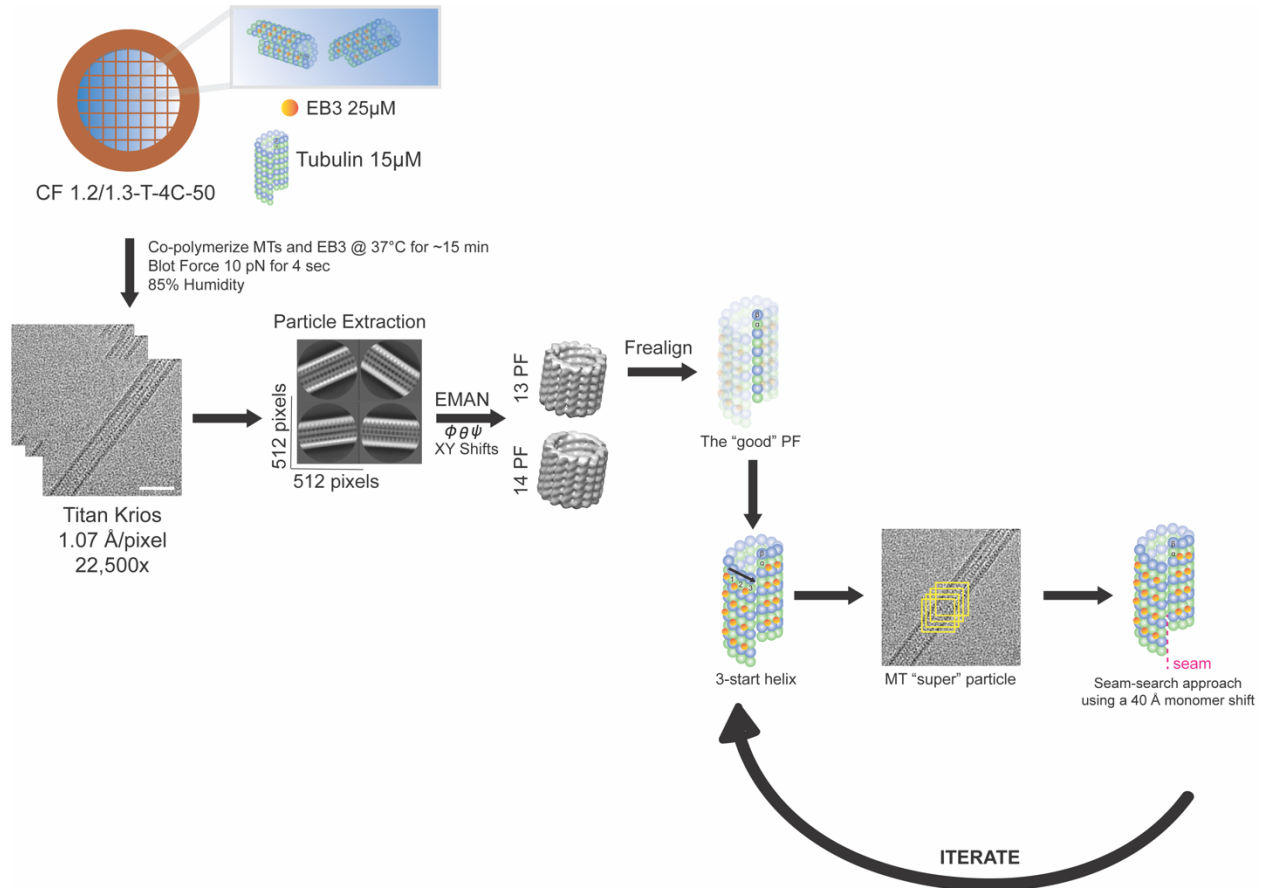

4

5 **Supplemental Figure 1. Schematic of the experimental workflow for sample**

6 **preparation and pseudo-helical image processing.** EB3 decorated MTs were added

7 to glow-discharged C-flat holey carbon grids (CF-1.2/1.3-4C, 400 mesh, Copper;

8 Protochips, Morrisville, NC) inside a Vitrobot (FEI, Hillsboro, OR) set at 37°C and 85%

9 humidity before plunge-freezing in ethane slush and liquid nitrogen. Images were

10 collected with the Titan Krios electron microscope (Thermo Fisher Scientific, Inc.,

11 Waltham, MA) operated at 300kV and equipped with a K2 direct detector (Gatan,

12 Pleasanton, CA). The micrographs were collected at a nominal magnification of

13 x22,500. Stacks of dose-fractionated image frames were aligned using the UCSF  
14 MotionCor2 software and CTF-corrected with CTFFIND4. MT segments were manually  
15 selected and converted to 90% overlapping boxes (512 × 512 pixels) for particle  
16 extraction. The remaining non-overlapping region is set to 80 Å and corresponds to the  
17 tubulin dimer repeat (asymmetric unit). These raw particles were compared to 2D  
18 projections of low-passed filtered MT models (~20 Å, 4° coarse angular step size) with  
19 13 and 14 PFs using the multi-reference alignment (MRA) feature of EMAN1. Next, 13-  
20 PF MT particles were refined in FREALIGN v. 9.11 using pseudo-helical symmetry to  
21 account for the presence of the seam. To verify the location of the seam, MTs were  
22 categorized based on their azimuthal angle and refined again.

23

24

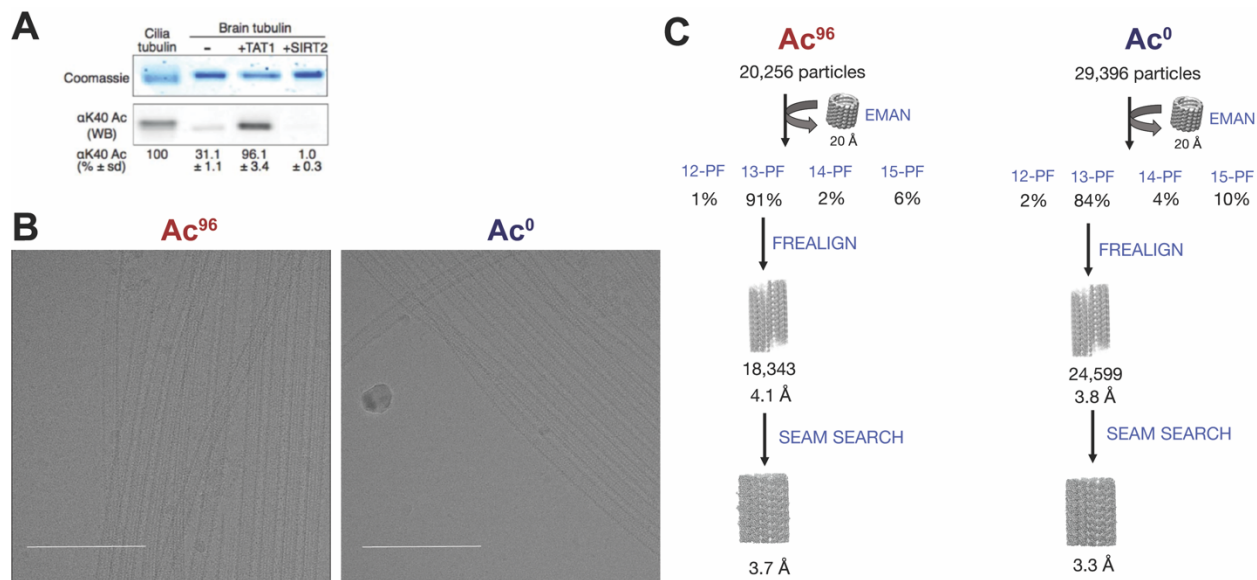

25

26 **Supplemental Figure 2. Sample preparation, data collection and image**

27 **processing of acetylated and deacetylated MT samples. (a)** Ac<sup>96</sup> and Ac<sup>0</sup> tubulin

28 preparations were produced by treating purified mammalian brain tubulin (Ac<sup>30</sup>) with

29 acetyltransferase  $\alpha$ TAT1 and deacetylase SIRT2. Samples were resolved on SDS-

30 page and Coomassie-stained (top panel) or immunoblotted for  $\alpha$ K40 acetylation (bottom

31 panel). Axomenal preparations from Tetrahymena cilia provide a 100% acetylation

32 calibrator. Adapted from Portran<sup>1</sup>. **(b)** Representative cryo-EM images of acetylated, in

33 the left panel, and deacetylated MTs, in the right panel. Scale bar = 200 nm. Images

34 were collected with the Titan Krios electron microscope (FEI, Hillsboro, OR) operated at

35 300kV and equipped with a K2 direct detector (Gatan, Pleasanton, CA). The

36 micrographs were collected at a nominal magnification of 22,500x, resulting in a final

37 pixel size of 1.07 Å per pixel and dose rate of 8 e-/pixel/s. **(c)** Schematic of data

38 collection. Using EB3, we generated >80% homogeneous samples to push the

39 resolution to ~3.5 Å.

40

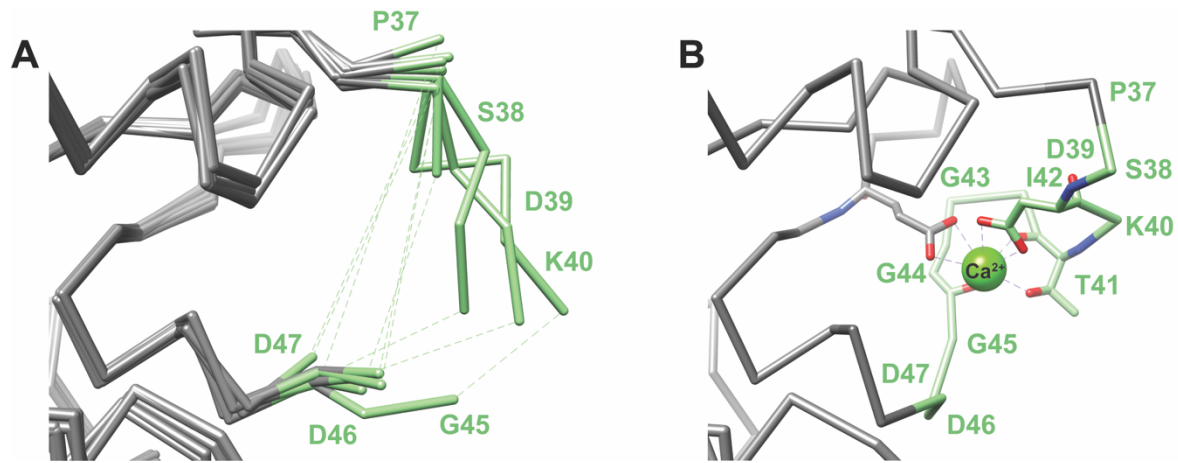

41  
 42 **Supplemental Figure 3. Previous proposed  $\alpha$ K40 loop models. (a)** Published PDBs  
 43 with incomplete models of the loop: 5NQU (Chain A), 5EYP (Chain A), 3RYC (Chain A),  
 44 3RYC (Chain C), 5NQT (Chain A), 3RYI (Chain A), 3RYI (Chain A), 3RYF (Chain A),  
 45 3RYF (Chain C). **(b)** Example of the a published PDB with the complete loop stabilized  
 46 by calcium: 5YL4 (Chain C).

47  
 48  
 49  
 50  
 51  
 52

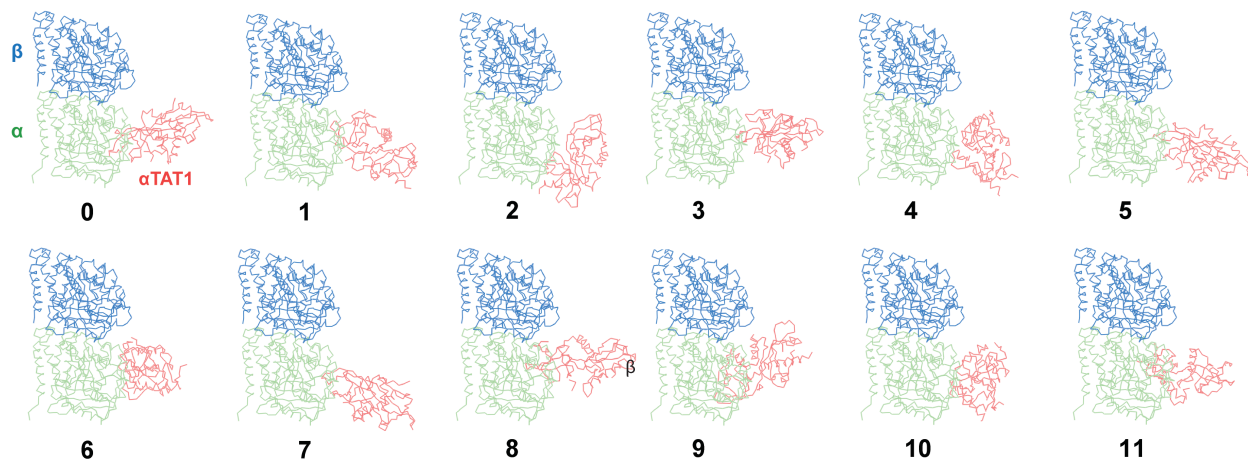

53  
54

55 **Supplemental Figure 4. Proposed mechanism for  $\alpha$ TAT1 intraluminal binding.**

56 The  $\alpha$ -carbon backbone of a bisubstrate analog containing  $\alpha$ -tubulin residues 38-41 in  
 57 complex with  $\alpha$ TAT1 (PDB ID: 4PK3) is shown superimposed to representative  $\alpha$ K40  
 58 loops of 12 clusters (0-11) from the metainference ensemble ( $\beta$ , sky blue;  $\alpha$ , light green,  
 59  $\alpha$ TAT1, deep salmon). All arrangements exhibit severe clashes between  $\alpha$ TAT1 and the  
 60 globular domain of  $\alpha$ -tubulin, except cluster #2, which is highly enriched in  $\text{Ac}^0$  samples  
 61 and only has a single clash between  $\alpha$ TAT1:R74 and  $\alpha$ -tubulin G57.

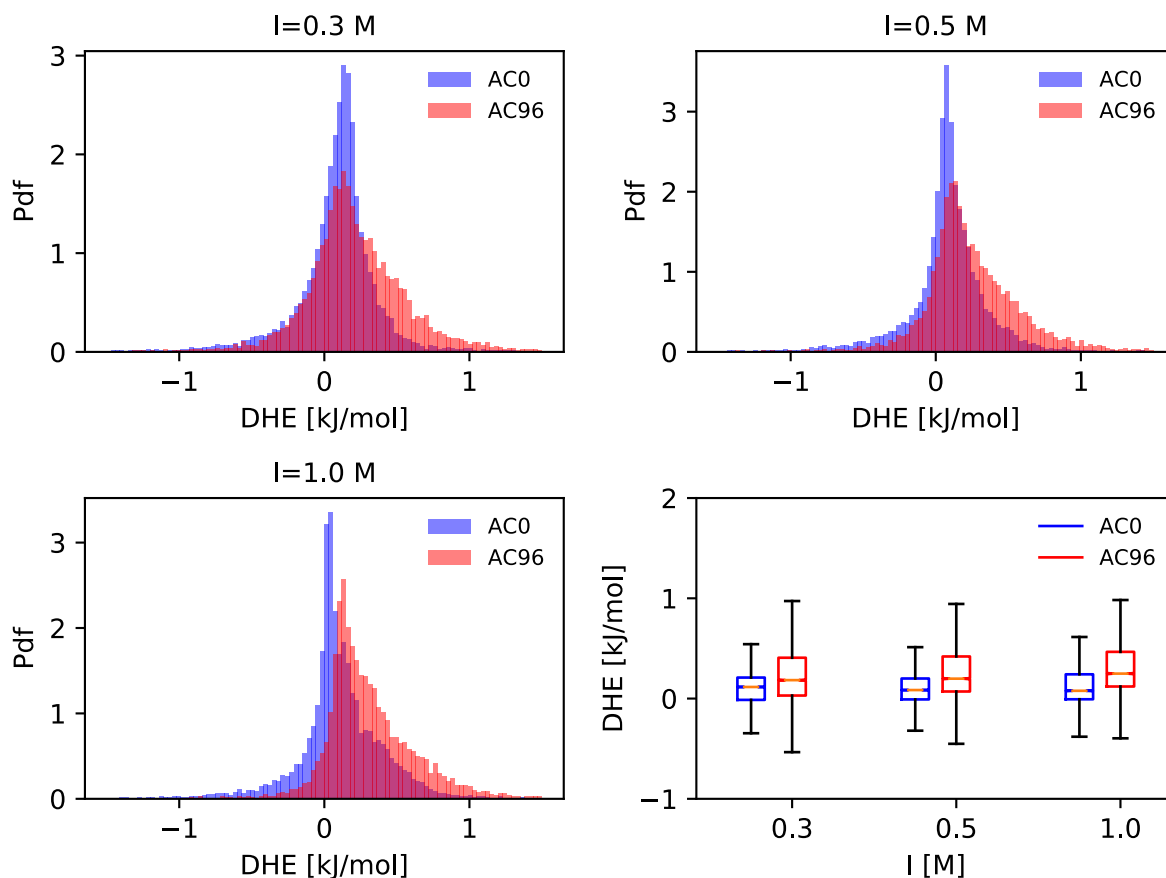

62

63 **Supplemental Figure 5. Acetylation weakens lateral interactions.** By analyzing the  
 64 distribution of Debye-Hückel (DH) electrostatic energy between adjacent  $\alpha$ -subunits  
 65 across the  $Ac^0$  (blue) and  $Ac^{96}$  ensembles (red), we find that acetylation weakens lateral  
 66 interactions at multiple ionic strengths (0.3-1.0M). The DH energy is calculated between  
 67 the following two groups of atoms: (i) all atoms in residue range 30-60 of chain A ( $\alpha 1$   
 68 subunit) and (ii) all atoms in residue range 200-380 of chain E ( $\alpha 2$  subunit) in PDBs  
 69 602S and 602T. The histograms show the probability density function as a function of  
 70 the DH interaction energy and the whisker plots show the shifts in the means with  
 71 quartile confidence intervals.

72

73

**A**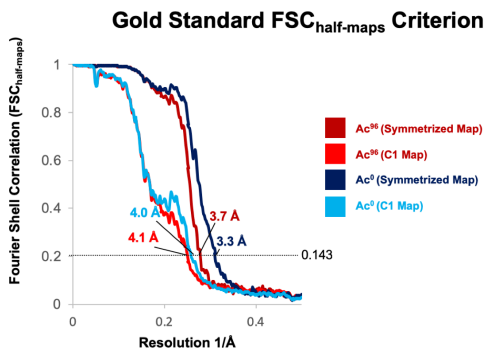**B**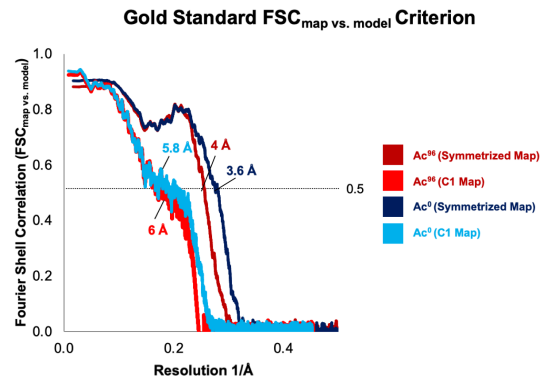

74

75 **Supplemental Figure 6. Fourier Shell Correlation Plots.**

76 The FSC<sub>half-map</sub> resolution, using **0.143** as the gold standard criterion, represents how  
 77 well the two half-maps from each dataset correlate as a function of spatial frequency.

78 The two half-maps were generated by dividing the final dataset into two independent  
 79 3D-reconstructions. The FSC<sub>map vs. model</sub> resolution, using **0.5** as the gold standard

80 criterion, represents how well the final map correlated with the refined atomic model. All

81 plots were generated in PHENIX.

82

83

84

85 **SUPPLEMENTAL TABLE 1. CryoEM data collection, refinement parameters, and**  
86 **validation statistics.**

| <b>Parameters</b>                          | <b>Ac<sup>96</sup> Symmetrized<br/>(EMDB-0612,<br/>PDB-602Q)</b> | <b>Ac<sup>0</sup> Symmetrized<br/>(EMDB-0613,<br/>PDB-602R)</b> | <b>Ac<sup>96</sup> C1<br/>(EMDB-0615,<br/>PDB-602T)</b> | <b>Ac<sup>0</sup> C1<br/>(EMDB-0614,<br/>PDB-602S)</b> |
|--------------------------------------------|------------------------------------------------------------------|-----------------------------------------------------------------|---------------------------------------------------------|--------------------------------------------------------|
| Magnification                              | 22500x                                                           | 22500x                                                          | 22500x                                                  | 22500x                                                 |
| Voltage                                    | 300                                                              | 300                                                             | 300                                                     | 300                                                    |
| Electron exposure (e-<br>/Å <sup>2</sup> ) | 25                                                               | 25                                                              | 25                                                      | 25                                                     |
| Defocus range (μm)                         | -1.5 to -2.5                                                     | -1.5 to -2.5                                                    | -1.5 to -2.5                                            | -1.5 to -2.5                                           |
| Pixel size (Å)                             | 1.07 Å                                                           | 1.07 Å                                                          | 1.07 Å                                                  | 1.07 Å                                                 |
| Symmetry imposed                           | HP                                                               | HP                                                              | C1                                                      | C1                                                     |
| Initial no. of images                      | 287                                                              | 871                                                             | 287                                                     | 871                                                    |
| Final no. of images                        | 278                                                              | 476                                                             | 278                                                     | 476                                                    |
| Initial no. of particles                   | 20256                                                            | 29396                                                           | 20256                                                   | 29396                                                  |
| Final no. of particles                     | 18432                                                            | 24692                                                           | 18432                                                   | 24692                                                  |
| Helical Rise                               |                                                                  |                                                                 | 9.3                                                     | 9.3                                                    |
| Helical Twist                              |                                                                  |                                                                 | 27.7                                                    | 27.7                                                   |
| Dimer Rise (Å)                             |                                                                  |                                                                 | 80.5                                                    | 81                                                     |
| Dimer Twist                                |                                                                  |                                                                 | -0.12°                                                  | -0.12°                                                 |
| <b>Map resolution (Å)</b>                  | <b>3.7</b>                                                       | <b>3.3</b>                                                      | <b>4.1</b>                                              | <b>4.0</b>                                             |
| FSC threshold                              | 0.143                                                            | 0.143                                                           | 0.143                                                   | 0.143                                                  |
| Map resolution range<br>(Å)                | 3.5-4.1 Å                                                        | 3.0-3.6 Å                                                       | 3.8-5.4 Å                                               | 3.5-4.5 Å                                              |
| <b>Refinement</b>                          |                                                                  |                                                                 |                                                         |                                                        |



|                                  |                            |                            |                            |                            |
|----------------------------------|----------------------------|----------------------------|----------------------------|----------------------------|
| Initial model used<br>(PDB ID)   | 3JAR                       | 3JAR                       | 3JAR                       | 3JAR                       |
| Model resolution (Å)             | 4 Å                        | 3.6 Å                      | 6 Å                        | 5.8 Å                      |
| FSC threshold                    | 0.5                        | 0.5                        | 0.5                        | 0.5                        |
| Map sharpening<br>method         | <i>Phenix_auto_sharpen</i> | <i>Phenix_auto_sharpen</i> | <i>Phenix_auto_sharpen</i> | <i>Phenix_auto_sharpen</i> |
| <b>Model composition</b>         |                            |                            |                            |                            |
| Nonhydrogen atoms                | 40866                      | 40866                      | 320775                     | 320775                     |
| Protein residues                 | 5184                       | 5184                       | 40702                      | 40702                      |
| Ligands (GTP, GDP)               | 12                         | 12                         | 94                         | 94                         |
| <b>B factors (Å<sup>2</sup>)</b> |                            |                            |                            |                            |
| Protein                          | 126.11                     | 96.80                      | 193.47                     | 161.40                     |
| Ligand                           | 122.25                     | 89.44                      | 192.42                     | 156.32                     |
| Bond lengths: RMS<br>(deviation) | 0.007                      | 0.007                      | 0.007                      | 0.006                      |
| Bond angles: RMS<br>(deviation)  | 1.110                      | 1.107                      | 1.110                      | 1.112                      |
| <b>Validation</b>                |                            |                            |                            |                            |
| MolProbity score                 | 1.57                       | 1.63                       | 1.80                       | 1.78                       |
| Clashscore                       | 6.64                       | 6.64                       | 9.15                       | 8.92                       |
| Rotamer outliers (%)             | 0.14                       | 0.41                       | 0.14                       | 0.14                       |
| <b>Ramachandran plot</b>         |                            |                            |                            |                            |
| Favored (%)                      | 96.74                      | 96.18                      | 95.48                      | 95.6                       |
| Outliers (%)                     | 0                          | 0                          | 0                          | 0                          |

87

88

89 Independent References Section

- 90 1. Portran, D., Schaedel, L., Xu, Z., Théry, M. & Nachury, M. V. Tubulin acetylation  
91 protects long-lived microtubules against mechanical ageing. *Nat. Cell Biol.* (2017).  
92 doi:10.1038/ncb3481

93
